# Supplementary material for: Synergistic effect of novel redox additives of p-nitroaniline and dimethylglyoxime for highly improving the supercapacitor performances
Source: Royal Society of Chemistry journal article supplement (doi:10.1039/c5cp06147d), 2015-12-21
Supplement: c5cp06147d1.pdf [file c5cp06147d1.pdf]

## Supporting Information:

### **Synergistic effect of novel redox additives of *p*-nitroaniline and dimethylglyoxime for highly improving the supercapacitor performances**

Yong Fu Nie<sup>1</sup>, Qian Wang<sup>1</sup>, Xiang Ying Chen<sup>1\*</sup>, and Zhong Jie Zhang<sup>2\*\*</sup>

<sup>1</sup>*School of Chemistry and Chemical Engineering, Anhui Key Laboratory of Controllable Chemistry Reaction & Material Chemical Engineering, Hefei University of Technology, Hefei, Anhui 230009, P R China. \*Corresponding author: Fax: +86 551 62901450. E-mail address: [cxyhfut@gmail.com](mailto:cxyhfut@gmail.com).*

<sup>2</sup>*College of Chemistry & Chemical Engineering, Anhui Province Key Laboratory of Environment-friendly Polymer Materials, Anhui University, Hefei 230039, Anhui, P. R. China. \*\* Also the corresponding author. E-mail: [zhangzj0603@126.com](mailto:zhangzj0603@126.com).*

**Optical analysis:**

Fourier transform infrared (FT-IR) spectroscopy of the **carbon-blank** and **carbon-DMG-0.15** was performed by a Nicolet 67 spectrometer (Thermo Nicolet, American) at room temperature (RT) for mid-IR (the frequency range of 4000 ~ 400  $\text{cm}^{-1}$ ) data collection. Room-temperature UV-vis spectroscopy was recorded between the range of 200 ~ 800 nm by a UV-vis spectrophotometer (UV-2550, Shimadzu Corporation, Japan) and the UV-vis absorption experiments were carried out on the 1 cm path length spectrometric quartz cell.

**Table S1.** Summary of DMG and PNA conditions in 6 mol L<sup>-1</sup> KOH electrolyte.

| NO. | Samples<br>(abbreviation) | DMG    | PNA    | KOH                    |
|-----|---------------------------|--------|--------|------------------------|
|     |                           | (mmol) | (mmol) | (mol L <sup>-1</sup> ) |
| 1.  | carbon-blank              | 0      | 0      | 6                      |
| 2.  | PNA-0.05                  | 0      | 0.05   | 6                      |
| 3.  | PNA-0.10                  | 0      | 0.10   | 6                      |
| 4.  | PNA-0.15                  | 0      | 0.15   | 6                      |
| 5.  | DMG-0.05-PNA-0.05         | 0.05   | 0.05   | 6                      |
| 6.  | DMG-0.05-PNA-0.10         | 0.05   | 0.10   | 6                      |
| 7.  | DMG-0.05-PNA-0.15         | 0.05   | 0.15   | 6                      |
| 8.  | DMG-0.10-PNA-0.05         | 0.10   | 0.05   | 6                      |
| 9.  | DMG-0.10-PNA-0.10         | 0.10   | 0.10   | 6                      |
| 10. | DMG-0.10-PNA-0.15         | 0.10   | 0.15   | 6                      |
| 11. | DMG-0.15-PNA-0.05         | 0.15   | 0.05   | 6                      |
| 12. | DMG-0.15-PNA-0.10         | 0.15   | 0.10   | 6                      |
| 13. | DMG-0.15-PNA-0.15         | 0.15   | 0.15   | 6                      |

**Notes:**

- 1) In the case of DMG, it has been incorporated into carbon matrix instead of KOH electrolyte;
- 2) In the case of PNA, it has been just introduced KOH electrolyte;
- 3) All experiments were carried out in 100 mL 6 mol L<sup>-1</sup> KOH electrolyte.

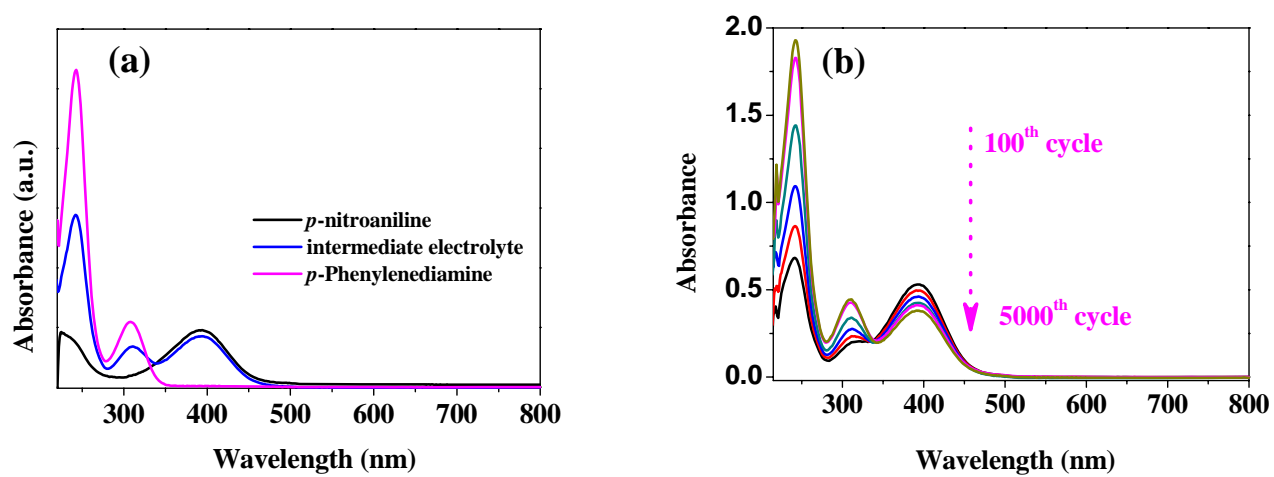

**Fig. S1.** (a) UV-vis absorption spectra of the *p*-nitroaniline, intermediate electrolyte, and *p*-phenylenediamine; (b) UV-vis absorption spectra of the mixed electrolyte in different stages of reaction.

**Table S2.** Observed decreases in capacitance for various samples after increasing the current density from 2 to 40 A g<sup>-1</sup>.

| <b>NO.</b> | <b>Samples</b> | <b>Initial capacitance</b><br><b>(F g<sup>-1</sup>)<sup>a</sup></b> | <b>Ultimate capacitance</b><br><b>(F g<sup>-1</sup>)<sup>b</sup></b> | <b>Capacitance retention</b><br><b>(%)</b> |
|------------|----------------|---------------------------------------------------------------------|----------------------------------------------------------------------|--------------------------------------------|
| 1.         | carbon-blank   | 146.8                                                               | 52.0                                                                 | 35.4                                       |
| 2.         | PNA-0.05       | 180.8                                                               | 84.0                                                                 | 46.5                                       |
| 3.         | PNA-0.10       | 298.6                                                               | 196.0                                                                | 65.7                                       |
| 4.         | PNA-0.15       | 226.2                                                               | 128.0                                                                | 56.6                                       |

**Notes:**

a: Specific capacitances calculated from GCD curves at a current density of 2 A g<sup>-1</sup>.

b: Specific capacitances calculated from GCD curves at a current density of 40 A g<sup>-1</sup>.

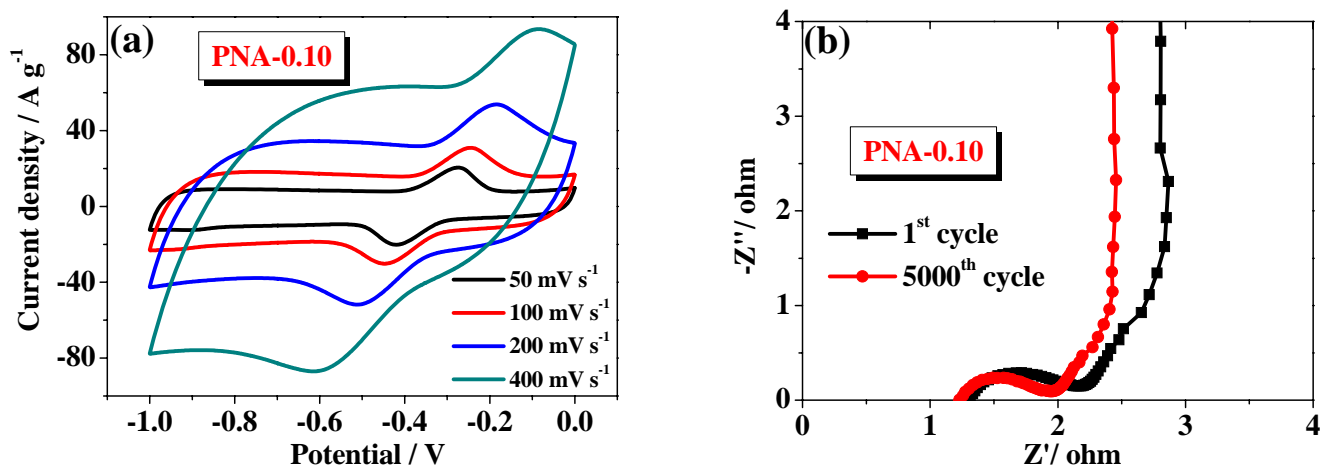

**Fig. S2.** The **PNA-0.10** sample measured in mixed electrolyte (6 mol L<sup>-1</sup> KOH and 0.10 mmol PNA): (a) CV curves at different scan rates; (b) Nyquist plots before/after 5000 cycles.

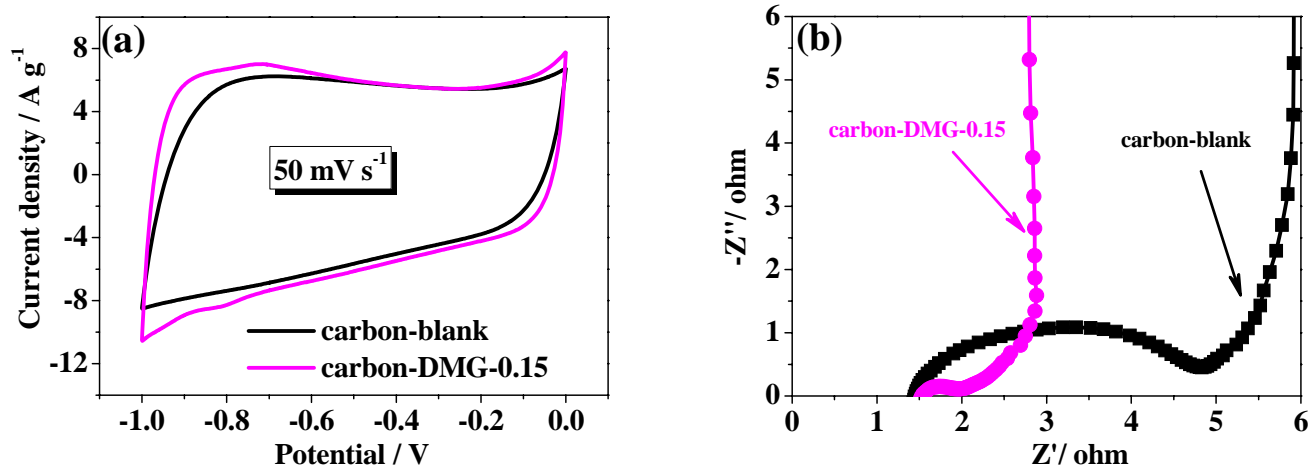

**Fig. S3.** The **carbon-blank** and **carbon-DMG-0.15** sample measured in a three-electrode system using 6 mol L<sup>-1</sup> KOH: (a) CV curves at a scan rate of 50 mV s<sup>-1</sup>; (b) Nyquist plots.

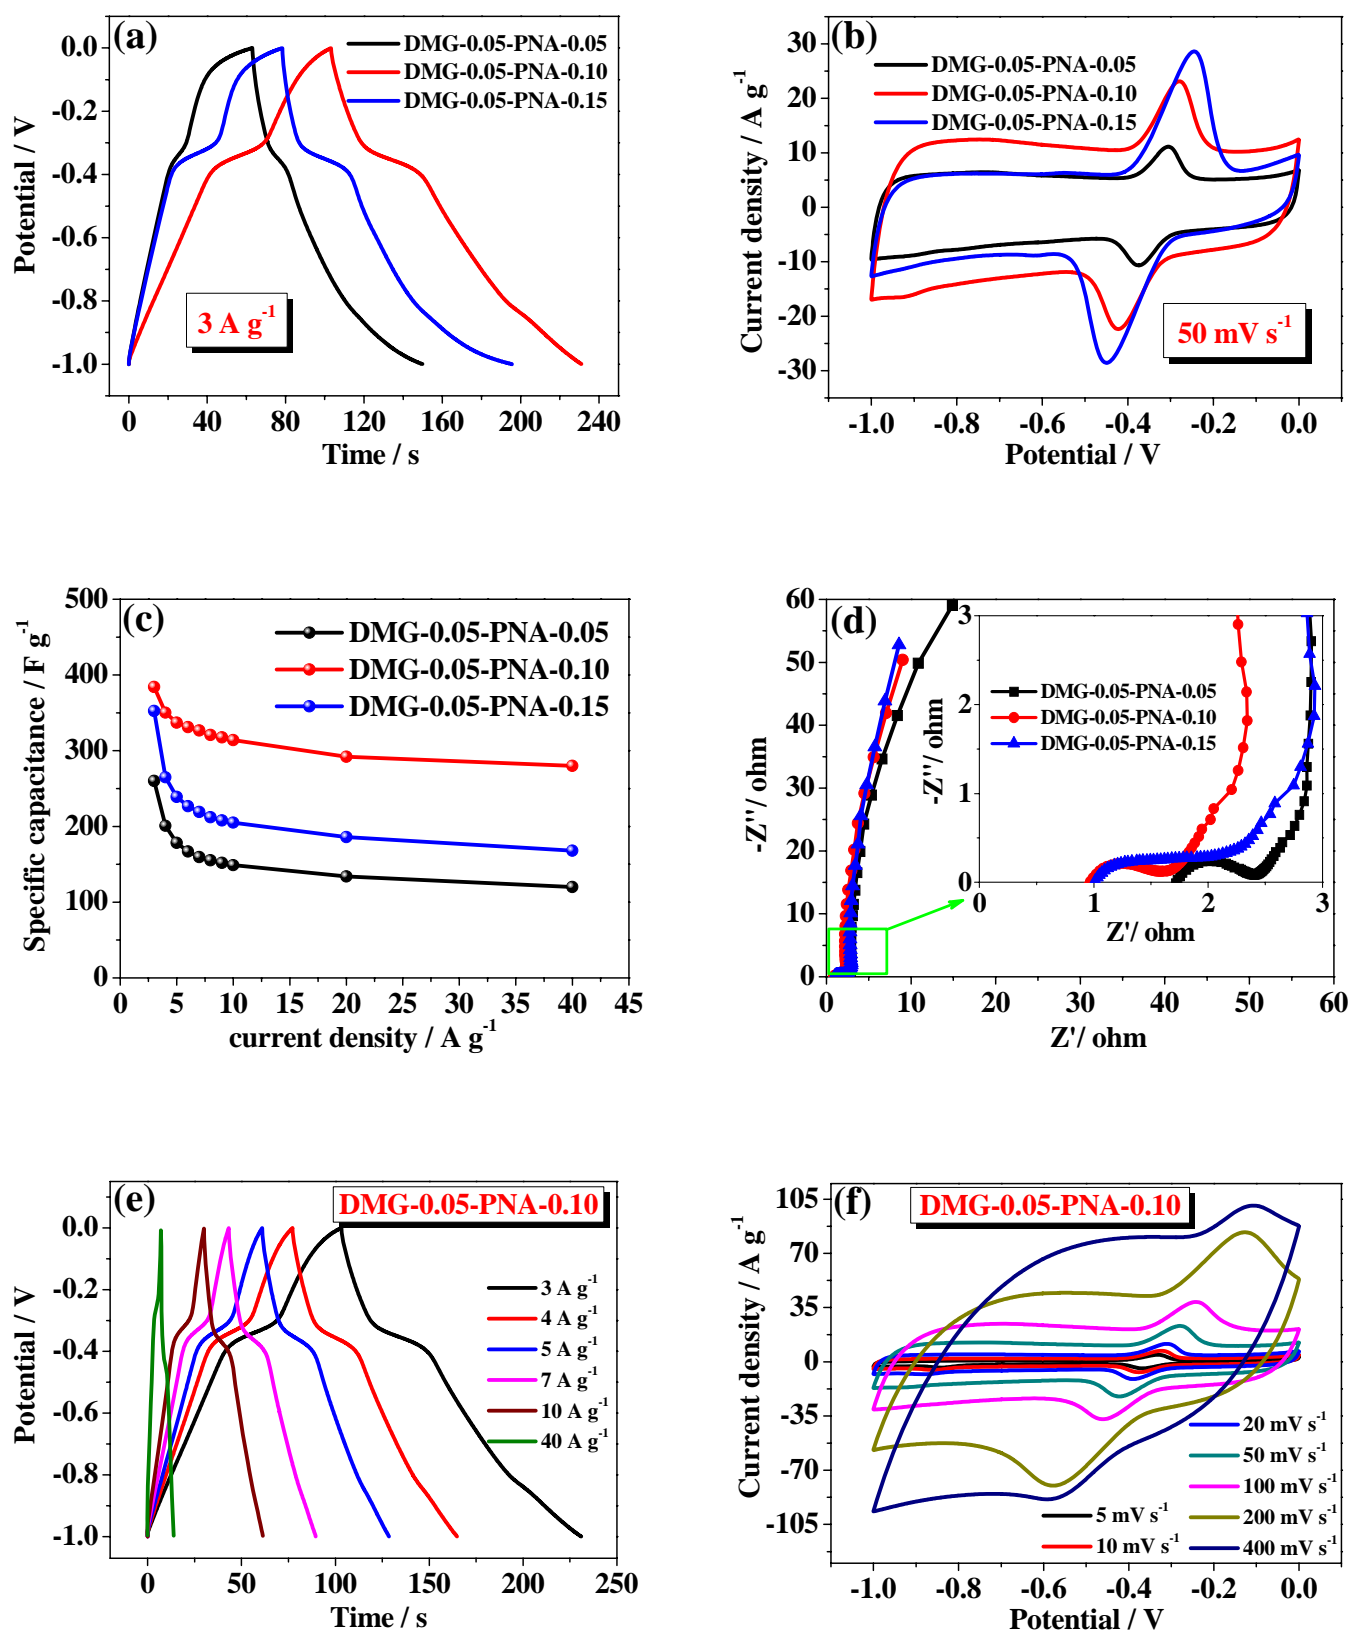

Fig. S4. The DMG-0.05-PNA-0.05/0.10/0.15 samples measured in a three-electrode



system using mixed electrolyte ( $6 \text{ mol L}^{-1}$  KOH and  $0.05/0.10/0.15 \text{ mmol PNA}$ ): (a) GCD curves at a current density of  $3 \text{ A g}^{-1}$ ; (b) CV curves at a scan rate of  $50 \text{ mV s}^{-1}$ ; (c) specific capacitances calculated from GCD curves; (d) Nyquist plots as well as the magnified ones (the inset); (e) GCD curves of the **DMG-0.05-PNA-0.10** sample at different current densities; (f) CV curves of the **DMG-0.05-PNA-0.10** at different scan rates.

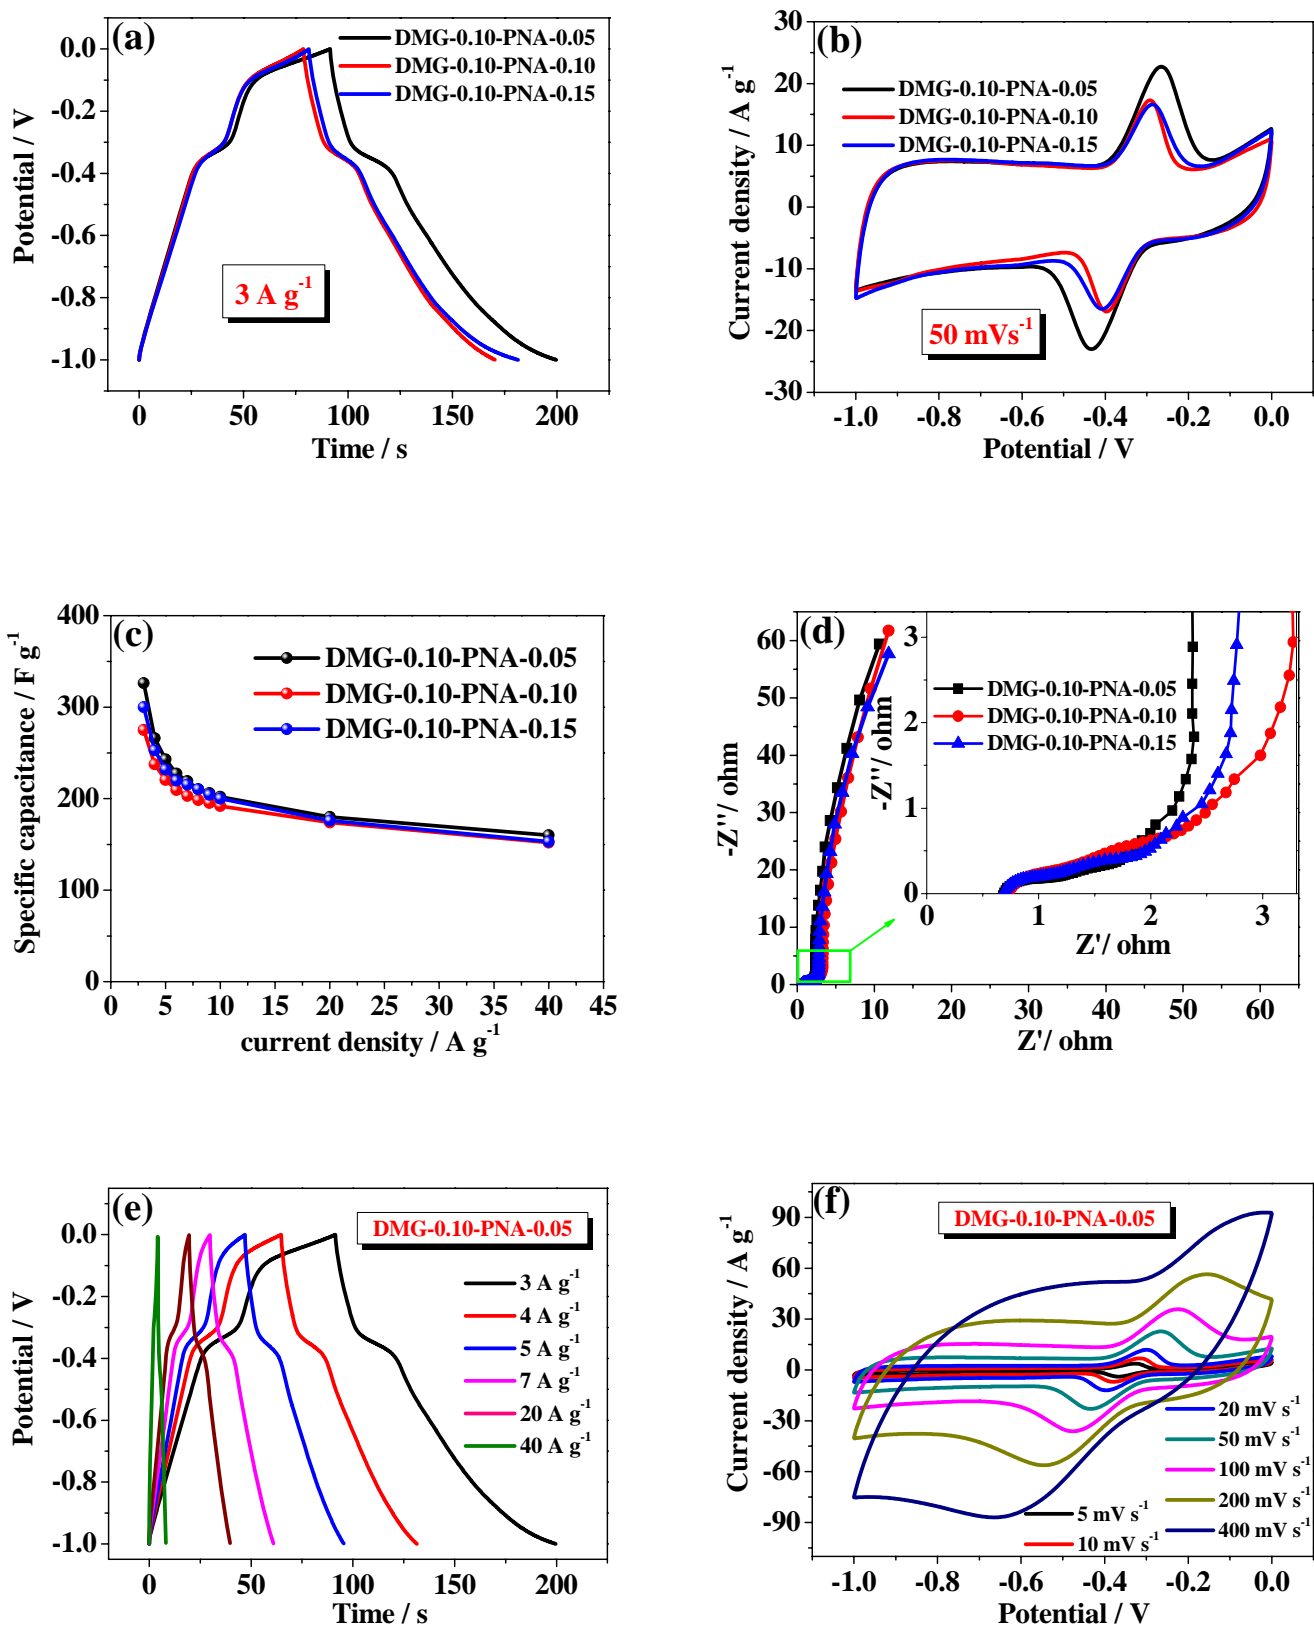

Fig. S5. The DMG-0.10-PNA-0.05/0.10/0.15 samples measured in a three-electrode

system using mixed electrolyte ( $6 \text{ mol L}^{-1}$  KOH and  $0.05/0.10/0.15 \text{ mmol PNA}$ ): (a) GCD curves at a current density of  $3 \text{ A g}^{-1}$ ; (b) CV curves at a scan rate of  $50 \text{ mV s}^{-1}$ ; (c) specific capacitances calculated from GCD curves; (d) Nyquist plots; (e) GCD curves of the **DMG-0.10-PNA-0.05** sample at different current densities; (f) CV curves of the **DMG-0.10-PNA-0.05** at different scan rates.

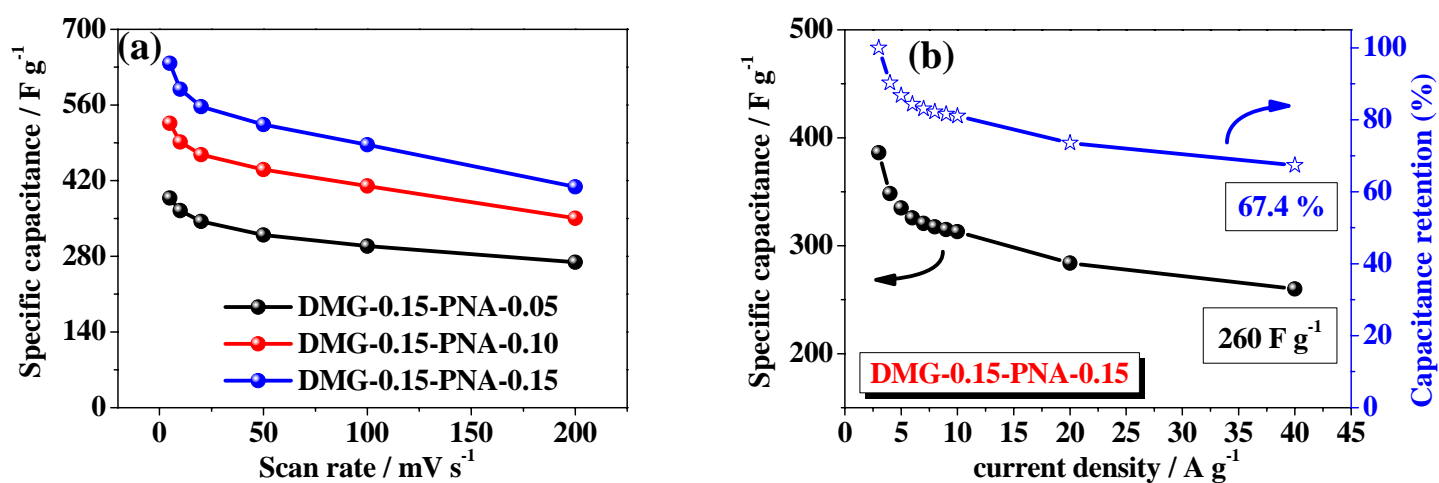

**Fig. S6.** The **DMG-0.15-PNA-0.05/0.10/0.15** samples measured in a three-electrode system using mixed electrolyte ( $6 \text{ mol L}^{-1}$  KOH with different amount of PNA acting as redox additive): (a) the variation of specific capacitance as a function of scan rate; the **DMG-0.15-PNA-0.15** sample: (b) specific capacitances and capacitance retention.

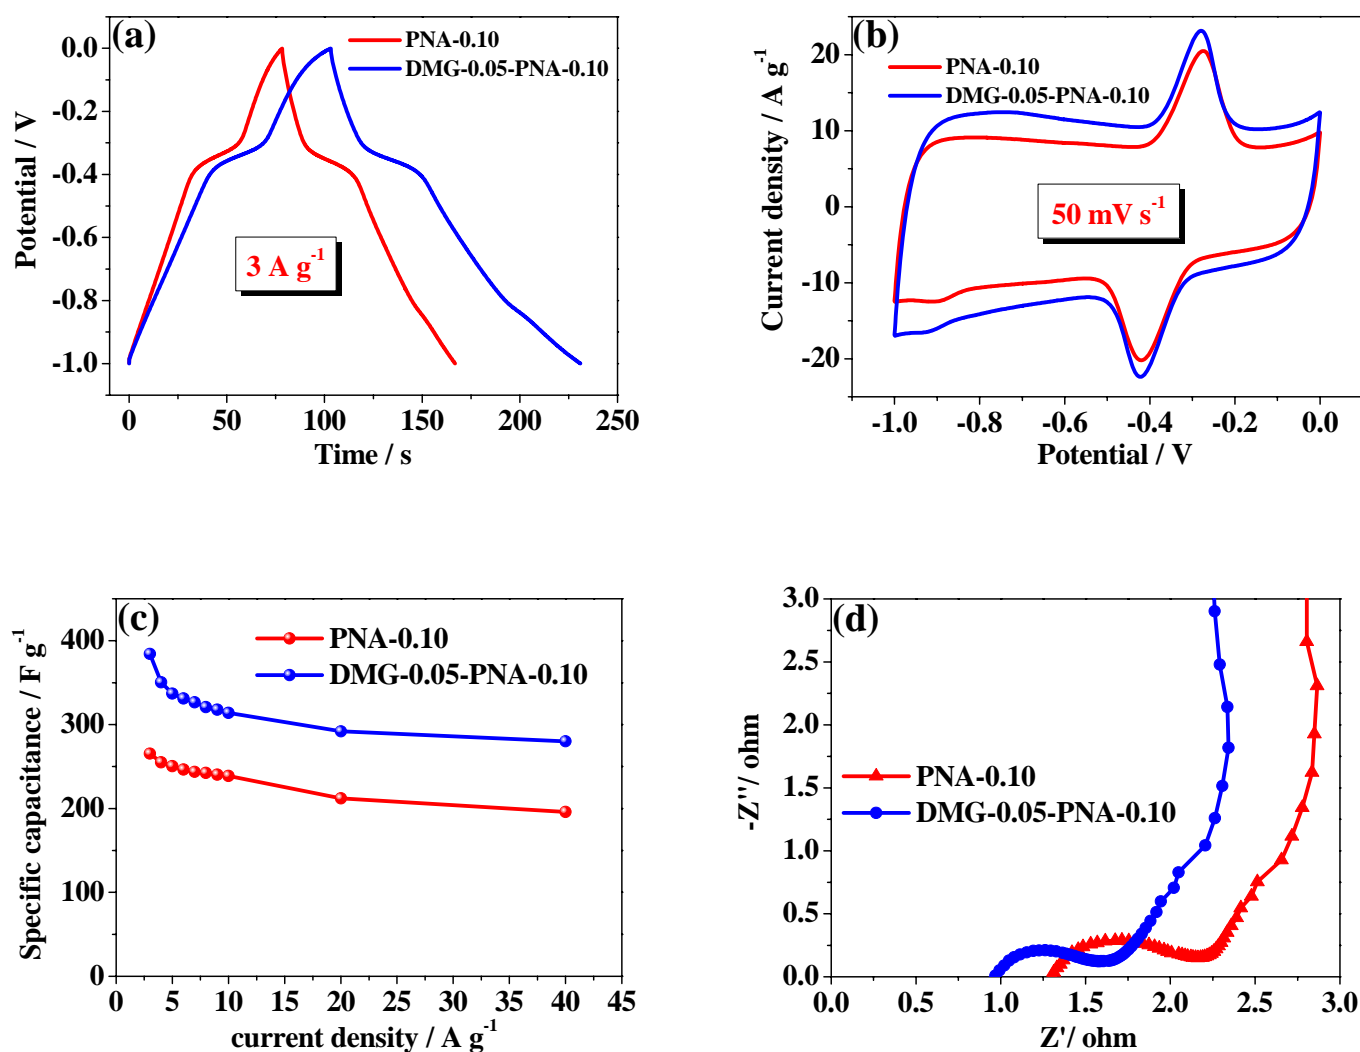

**Fig. S7.** The **PNA-0.10** and **DMG-0.05-PNA-0.10** samples measured in a three-electrode system: (a) GCD curves at a current density of  $3 \text{ A g}^{-1}$ ; (b) CV curves at a scan rate of  $50 \text{ mV s}^{-1}$ ; (c) specific capacitances calculated from GCD curves; (d) Nyquist plots as well as the magnified ones (the inset).

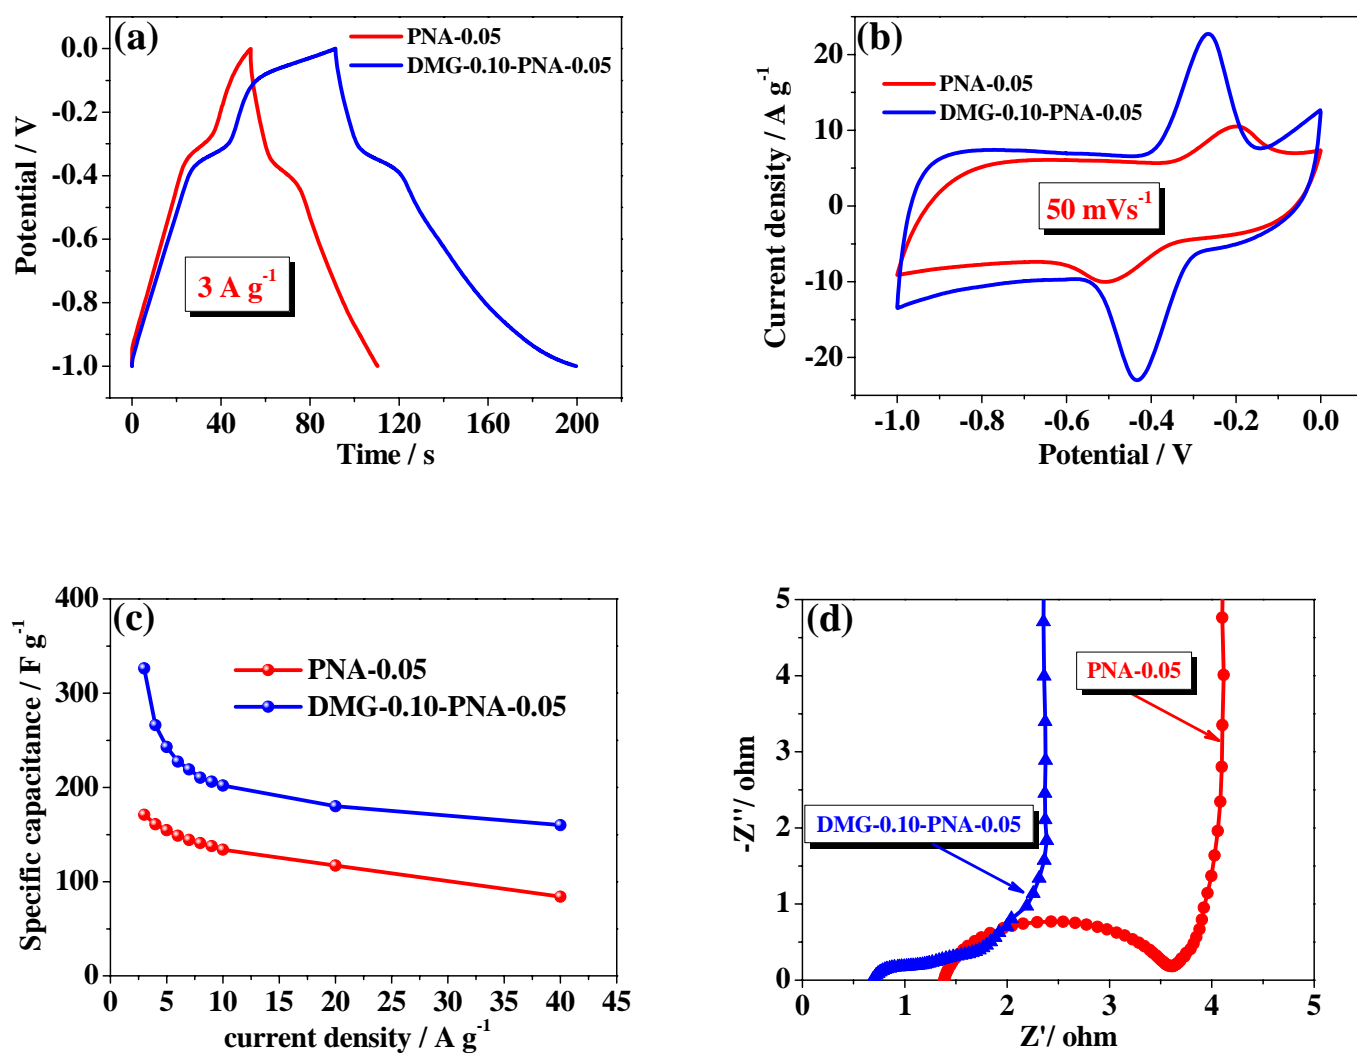

**Fig. S8.** The PNA-0.05 and DMG-0.10-PNA-0.05 samples measured in a three-electrode system: (a) GCD curves at a current density of  $3 \text{ A g}^{-1}$ ; (b) CV curves at a scan rate of  $50 \text{ mV s}^{-1}$ ; (c) specific capacitances calculated from GCD curves; (d) Nyquist plots.
